# Supplementary material
Source: publisher figshare collection journal article supplement (https://asha.figshare.com/articles/dataset/_/24347761)
Supplement: Supplementary file 1 [file 1]

**Supplemental Material S1.** Modeled population contrasts in mean auditory brainstem response wave I amplitude.

| Contrast               | Level<br>(dB peSPL) | 90% Bayesian<br>Confidence<br>Interval<br>(lower bound) | Estimate<br>(in $\mu$ V) | 90% Bayesian<br>Confidence<br>Interval<br>(upper bound) |
|------------------------|---------------------|---------------------------------------------------------|--------------------------|---------------------------------------------------------|
| Veteran-NT – control   | 90                  | –0.06                                                   | –0.02                    | 0.00                                                    |
| Veteran-NT – control   | 100                 | –0.07                                                   | –0.01                    | 0.05                                                    |
| Veteran-NT – control   | 110                 | –0.10                                                   | –0.01                    | 0.07                                                    |
| Veteran-T – control    | 90                  | –0.06                                                   | –0.02                    | 0.02                                                    |
| Veteran-T – control    | 100                 | –0.07                                                   | 0.00                     | 0.07                                                    |
| Veteran-T – control    | 110                 | –0.09                                                   | 0.02                     | 0.14                                                    |
| Veteran-T – Veteran-NT | 90                  | –0.03                                                   | 0.00                     | 0.04                                                    |
| Veteran-T – Veteran-NT | 100                 | –0.06                                                   | 0.01                     | 0.08                                                    |
| Veteran-T – Veteran-NT | 110                 | –0.07                                                   | 0.03                     | 0.16                                                    |
