# Supplementary material
Source: publisher figshare collection journal article supplement (https://asha.figshare.com/articles/dataset/_/24347761)
Supplement: Supplementary file 2 [file 1]

**Supplemental Material S3.** Modeled population contrasts in mean envelope following response magnitude.

| <b>Contrast</b>        | <b>Modulation Depth</b> | <b>90% Bayesian Confidence Interval (lower bound)</b> | <b>Estimate (in dB)</b> | <b>90% Bayesian Confidence Interval (upper bound)</b> |
|------------------------|-------------------------|-------------------------------------------------------|-------------------------|-------------------------------------------------------|
| Veteran-NT – control   | 100%                    | -2.4                                                  | -0.5                    | 1.2                                                   |
| Veteran-NT – control   | 63%                     | -3.4                                                  | -1.8                    | -0.2                                                  |
| Veteran-NT – control   | 40%                     | -3.5                                                  | -1.8                    | 0.1                                                   |
| Veteran-T – control    | 100%                    | -4.5                                                  | -2.4                    | -0.3                                                  |
| Veteran-T – control    | 63%                     | -4.3                                                  | -2.3                    | -0.4                                                  |
| Veteran-T – control    | 40%                     | -4.8                                                  | -2.6                    | -0.4                                                  |
| Veteran-T – Veteran-NT | 100%                    | -3.9                                                  | -1.9                    | 0.4                                                   |
| Veteran-T – Veteran-NT | 63%                     | -2.5                                                  | -0.5                    | 1.3                                                   |
| Veteran-T – Veteran-NT | 40%                     | -3.2                                                  | -0.9                    | 1.4                                                   |
