# Supplementary material
Source: publisher figshare collection journal article supplement (https://asha.figshare.com/articles/dataset/_/24347761)
Supplement: Supplementary file 3 [file 1]

**Supplemental Material S2.** Modeled population contrasts in mean middle ear muscle reflex magnitude.

| <b>Contrast</b>        | <b>Elicitor Level (dB SPL)</b> | <b>90% Bayesian Confidence Interval (lower bound)</b> | <b>Estimate (in dB)</b> | <b>90% Bayesian Confidence Interval (upper bound)</b> |
|------------------------|--------------------------------|-------------------------------------------------------|-------------------------|-------------------------------------------------------|
| Veteran-NT – control   | 55                             | -0.15                                                 | 0.01                    | 0.21                                                  |
| Veteran-NT – control   | 60                             | -0.19                                                 | 0.02                    | 0.27                                                  |
| Veteran-NT – control   | 65                             | -0.22                                                 | 0.03                    | 0.37                                                  |
| Veteran-NT – control   | 70                             | -0.33                                                 | 0.02                    | 0.44                                                  |
| Veteran-NT – control   | 75                             | -0.37                                                 | 0.06                    | 0.65                                                  |
| Veteran-NT – control   | 80                             | -0.39                                                 | 0.10                    | 0.93                                                  |
| Veteran-NT – control   | 85                             | -0.51                                                 | 0.12                    | 1.18                                                  |
| Veteran-NT – control   | 90                             | -0.59                                                 | 0.22                    | 1.76                                                  |
| Veteran-NT – control   | 95                             | -0.68                                                 | 0.32                    | 2.40                                                  |
| Veteran-NT – control   | 100                            | -0.96                                                 | 0.40                    | 3.09                                                  |
| Veteran-T – control    | 55                             | -0.24                                                 | -0.01                   | 0.20                                                  |
| Veteran-T – control    | 60                             | -0.32                                                 | -0.02                   | 0.23                                                  |
| Veteran-T – control    | 65                             | -0.44                                                 | -0.04                   | 0.25                                                  |
| Veteran-T – control    | 70                             | -0.67                                                 | -0.09                   | 0.24                                                  |
| Veteran-T – control    | 75                             | -0.92                                                 | -0.14                   | 0.25                                                  |
| Veteran-T – control    | 80                             | -1.21                                                 | -0.19                   | 0.28                                                  |
| Veteran-T – control    | 85                             | -1.68                                                 | -0.29                   | 0.29                                                  |
| Veteran-T – control    | 90                             | -2.38                                                 | -0.44                   | 0.24                                                  |
| Veteran-T – control    | 95                             | -3.19                                                 | -0.61                   | 0.25                                                  |
| Veteran-T – control    | 100                            | -4.41                                                 | -0.90                   | 0.20                                                  |
| Veteran-T – Veteran-NT | 55                             | -0.27                                                 | -0.02                   | 0.18                                                  |
| Veteran-T – Veteran-NT | 60                             | -0.37                                                 | -0.04                   | 0.20                                                  |
| Veteran-T – Veteran-NT | 65                             | -0.53                                                 | -0.07                   | 0.19                                                  |
| Veteran-T – Veteran-NT | 70                             | -0.75                                                 | -0.11                   | 0.20                                                  |
| Veteran-T – Veteran-NT | 75                             | -1.13                                                 | -0.20                   | 0.16                                                  |
| Veteran-T – Veteran-NT | 80                             | -1.58                                                 | -0.31                   | 0.14                                                  |
| Veteran-T – Veteran-NT | 85                             | -2.13                                                 | -0.44                   | 0.11                                                  |
| Veteran-T – Veteran-NT | 90                             | -3.19                                                 | -0.72                   | -0.01                                                 |
| Veteran-T – Veteran-NT | 95                             | -4.39                                                 | -1.01                   | -0.07                                                 |
| Veteran-T – Veteran-NT | 100                            | -5.91                                                 | -1.40                   | -0.15                                                 |
